# Supplementary material
Source: PubMed Central journal article supplement (PMC6220690)
Supplement: 10-4338-aci-2017-04-0054-supp2.pdf [file 10-4338-aci-2017-04-0054-supp2.pdf]

## Appendix B: Stanford Children's Health EHR Observation Checklist

This is an online form that allows the user to write as much as needed and is stored in a sharepoint database.

|                                                |                                                                                                                                                                                              |
|------------------------------------------------|----------------------------------------------------------------------------------------------------------------------------------------------------------------------------------------------|
| ID *                                           | <input type="text"/>                                                                                                                                                                         |
| Specialty                                      | <input type="text"/>                                                                                                                                                                         |
| Location                                       | <input type="text"/>                                                                                                                                                                         |
| Date and Time                                  | Date <input type="text"/>  Hours <input type="text" value="12 AM"/> Minutes <input type="text" value="00"/> |
| Simple Description of Observation              | <input type="text"/>                                                                                                                                                                         |
| Using CPOE?                                    | <input type="checkbox"/>                                                                                                                                                                     |
| Correctly Orders Labs?                         | <input type="checkbox"/>                                                                                                                                                                     |
| Managing Problem List from Order Entry         | <input type="checkbox"/>                                                                                                                                                                     |
| Documenting using Widescreen view              | <input type="checkbox"/>                                                                                                                                                                     |
| Why/Why not using Widescreen for documentation | <input type="checkbox"/>                                                                                                                                                                     |
| Documenting in advance                         | <input type="checkbox"/>                                                                                                                                                                     |
| Why/Why not documenting in advance             | <input type="text"/>                                                                                                                                                                         |
| Document in Exam Room                          | <input type="checkbox"/>                                                                                                                                                                     |
| Why/Why not documenting in Exam Room?          | <input type="text"/>                                                                                                                                                                         |
| Document in a linear fashion?                  | <input type="checkbox"/>                                                                                                                                                                     |
| Describe the documentation fashion             | <input type="text"/>                                                                                                                                                                         |
| Using Dragon?                                  | <input type="checkbox"/>                                                                                                                                                                     |

Is the provider using CPOE for all orders?

Is the provider ordering labs accurately?

Does the provider add Problems from within Order Entry?

Does the provider use the Widescreen View?

Explain why the provider prefers to or has decided against using Widescreen View for Documentation

Does the provider document in advance of seeing patient?

Does the provider document while with the patient in exam room?

In what fashion does the provider document?

Does the provider currently use Dragon for documentation?

Would like to use Dragon

Would the provider like to use Dragon software for documentation?

Reason(s) for/against using Dragon

Describe why the provider does/does not wish to use Dragon for documentation

Ever used Dragon for documentation?

Has the provider ever used Dragon for documentation? (anywhere)

User Dictionary

Using the User Dictionary?

Aware of User Dictionary?

Is the provider aware of the User Dictionary?

Able to find labs easily  
Finding labs - How?

How does the provider find labs?

Accessing Templates

How does the provider Access Templates?

Ambulatory Manager  
Dashboard

Chart Review Report  
Preview

Chart Search

Results review or Results in  
InBasket

Results Review

Results in InBasket

Filters in Chart Review

Does the provider use filters in order to Review Chart more quickly/easily?

Media tab

Does the provider use the Media Tab in Chart Review to review the Chart?

Ordering using Search or  
Preference List

Search

Preference List

Closing encounters b/w  
patients

Which does the provider use for ordering?

List common SmartLinks

Which SmartLinks is the provider using most often?

Using Communication Management

Using last of previous buttons

Is provider using the last or previous buttons to cc: people from previous visit?

Copy & paste labs

Correct toolbar buttons

Co-signing Notes from

Where does the provider co-sign notes?

Edit (link to edit items)

Efficient Searching

Excessive Scrolling

Extra Keyboard to Mouse moves

Filters

Home Dashboard

Keyboard Shortcuts

Letter Templates

LOS Shortcuts

Marking InBasket b/w patients

Note Sidebar

Note template/SmartPhrase

Pinning Notes to Sidebar

Preference List

Reasons for or against pinning notes to sidebar

Reporting Workbench

Does the provider use the reporting workbench?

RX Auth correctly

Select multiples when available

Slicer Dicer

SmartLinks

Snipping Tool

Spellcheck

Time and Date Shortcuts

QuickActions

When do you close encounters?

Before seeing patients

In between patients

After all patients are seen

Specify your own value:

Where do you close encounters?

Clinic

Home

Specify your own value:

Workflow for Research Patients

Co-sign Notes from

Inpatient

Ambulatory

Transcription

Specify your own value:

General Notes

General Notes regarding Observation

Note on Strengths

Notes on Opportunities
